# Supplementary material
Source: MDPI journal article supplement (https://www.mdpi.com/2071-1050/12/24/10597)
Supplement: s1 [file s1]

## Sheet: Blad1
	Table S1: Number of portions of different food products consumed weekly in different countries
			Mozambique	Liberia	Bangladesh	India	Congo	Viet Nam	Japan	World	Namibia	South Africa	Colombia	Paraguay	Czech Republic	Spain	Uzbekistan	Netherlands	Norway	France	Canada	USA	Australia	Argentina	New Zealand
		Beef	0	0	0	0	1	1	2	2	1	3	3	4	2	2	5	3	4	5	6	7	7	10	4
		Pork	1	0	0	0	0	7	4	3	1	1	1	5	8	9	0	7	4	6	4	5	5	2	4
		Poultry	0	2	0	0	2	2	4	3	2	7	5	1	4	5	0	5	4	5	7	10	9	7	7
		Lamb & mutton	0	0	0	0	0	0	0	0	0	1	0	9	9	0	1	0	1	0	0	0	2	0	4
		Fish	1	1	3	1	5	5	6	3	2	1	1	1	2	5	0	4	7	5	3	2	3	1	4
		Cheese	0	0	0	0	0	0	3	3	1	1	1	9	16	9	1	17	14	12	11	15	10	11	8
		Milk	0	0	2	7	0	1	6	7	6	4	9	6	16	13	10	26	21	20	15	20	18	15	11
		Eggs	0	1	1	1	0	1	7	3	1	3	4	8	4	5	2	5	4	5	5	6	3	4	4
